# Supplementary material for: Association of Urinary Potassium Excretion with Blood Pressure Variability and Cardiovascular Outcomes in Patients with Pre-Dialysis Chronic Kidney Disease
Source: MDPI journal article supplement (doi:10.3390/nu13124443), 2021-12-13
Supplement: s1 [file s1]

**- Supplemental Materials -**

**Association of urinary potassium excretion with blood pressure variability and cardiovascular outcomes in patients with pre-dialysis chronic kidney disease**

Sang Heon Suh, M.D., Ph.D.<sup>1</sup>, Su Hyun Song, M.D., M.S.<sup>1</sup>, Tae Ryom Oh, M.D., Ph.D.<sup>1</sup>, Hong Sang Choi, M.D., Ph.D.<sup>1</sup>, Chang Seong Kim, M.D., Ph.D.<sup>1</sup>, Eun Hui Bae, M.D., Ph.D.<sup>1</sup>, Kook-Hwan Oh, M.D., Ph.D.<sup>2</sup>, Joongyub Lee, M.D., Ph.D.<sup>3</sup>, Seung Hyeok Han, M.D., Ph.D.<sup>4</sup>, Yeong Hoon Kim, M.D., Ph.D.<sup>5</sup>, Dong Wan Chae, M.D., Ph.D.<sup>6</sup>, Seong Kwon Ma\*, M.D., Ph.D.<sup>1</sup>, and Soo Wan Kim\*, M.D., Ph.D.<sup>1</sup>, on behalf of the Korean Cohort Study for Outcomes in Patients With Chronic Kidney Disease (KNOW-CKD) Investigators

<sup>1</sup>Department of Internal Medicine, Chonnam National University Medical School and Chonnam National University Hospital, Gwangju, Korea

<sup>2</sup>Department of Internal Medicine, Seoul National University, Seoul, Korea

<sup>3</sup>Department of Prevention and Management, School of Medicine, Inha University, Incheon, Republic of Korea

<sup>4</sup>Department of Internal Medicine, College of Medicine, Institute of Kidney Disease Research, Yonsei University, Seoul, Korea

<sup>5</sup>Department of Nephrology, College of Medicine, Inje University, Busan, Korea

<sup>6</sup>Department of Internal Medicine, Seoul National University Bundang Hospital, Seongnam, Gyeonggi-do, Korea

**Corresponding authors**

\*Seong Kwon Ma, MD, PhD. Department of Internal Medicine, Chonnam National University Medical School, 42 Jebongro, Gwangju 61469, Korea, Tel: +82-62-220-6579, Fax: +82-62-225-8578, Email: drmsk@hanmail.net

\*Soo Wan Kim, MD, PhD. Department of Internal Medicine, Chonnam National University Medical School, 42 Jebongro, Gwangju 61469, Korea, Tel: +82-62-220-6271, Fax: +82-62-225-8578, Email: skimw@chonnam.ac.kr

## **Table of Contents**

Table S1. Baseline characteristics of study participants in the quartiles by spot urine  $\text{Na}^+/\text{Cr}$

Table S2. Baseline characteristics of study participants in the quartiles by spot urine  $\text{Na}^+/\text{K}^+$

Table S3. Cox regression analysis of urine sodium excretion for clinical outcomes

Table S4. Cox regression analysis of urine  $\text{Na}^+/\text{K}^+$  for clinical outcomes

Table S5. Multivariate linear regression analysis for BPV with low urine potassium excretion excluding the subjects with CKD stage 5

Table S6. Cox regression analysis of urine potassium excretion for clinical outcomes excluding the subjects with CKD stage 5

Table S7. Multivariate linear regression analysis for BPV with low urine potassium excretion excluding the subjects with CKD stage 1

Table S8. Cox regression analysis of urine potassium excretion for clinical outcomes excluding the subjects with CKD stage 1

Table S9. Multivariate linear regression analysis for ARV with low urine potassium excretion in various subgroups

Table S10. Cox regression analysis of urine potassium excretion for all-cause mortality in various subgroups

**Table S1. Baseline characteristics of study participants in the quartiles by spot urine Na<sup>+</sup>/Cr**

|                                        | Spot urine Na <sup>+</sup> /Cr |                   |                   |                  | <i>P</i> value |
|----------------------------------------|--------------------------------|-------------------|-------------------|------------------|----------------|
|                                        | Q1                             | Q 2               | Q 3               | Q 4              |                |
| Urine Na <sup>+</sup> /Cr (mmol/gCr)   | 34.156 ± 13.115                | 71.943 ± 9.820    | 109.523 ± 11.911  | 189.753 ± 62.032 | < 0.001        |
| Age (year)                             | 52.411 ± 12.714                | 53.378 ± 12.256   | 53.587 ± 11.577   | 55.056 ± 11.438  | 0.009          |
| Male                                   | 321 (69.0)                     | 310 (66.7)        | 271 (58.3)        | 218 (46.9)       | < 0.001        |
| Charlson comorbidity index             |                                |                   |                   |                  | 0.480          |
| 0 – 3                                  | 342 (73.5)                     | 348 (74.8)        | 343 (73.8)        | 338 (72.7)       |                |
| 4 – 5                                  | 114 (24.5)                     | 109 (23.4)        | 119 (25.6)        | 118 (25.4)       |                |
| ≥ 6                                    | 9 (1.9)                        | 8 (1.7)           | 3 (0.6)           | 9 (1.9)          |                |
| History of DM                          | 146 (31.4)                     | 135 (29.0)        | 147 (31.6)        | 162 (34.8)       | 0.586          |
| Medication                             |                                |                   |                   |                  |                |
| ACEi/ARBs                              | 381 (87.8)                     | 418 (93.9)        | 393 (91.0)        | 409 (91.1)       | 0.018          |
| Diuretics                              | 145 (33.4)                     | 134 (30.1)        | 132 (30.6)        | 150 (33.4)       | 0.585          |
| Number of antihypertensive drugs ≥ 3   | 153 (32.9)                     | 133 (28.6)        | 125 (26.9)        | 154 (33.1)       | 0.092          |
| BMI (kg/m <sup>2</sup> )               | 24.419 ± 3.386                 | 24.653 ± 3.218    | 24.565 ± 3.493    | 24.623 ± 3.399   | 0.724          |
| WC                                     | 86.738 ± 9.444                 | 87.882 ± 9.537    | 96.920 ± 9.791    | 87.786 ± 9.915   | 0.188          |
| SBP (mmHg)                             | 125.800 ± 14.592               | 126.082 ± 14.574  | 127.316 ± 16.021  | 128.890 ± 16.180 | 0.008          |
| DBP (mmHg)                             | 76.572 ± 10.515                | 76.916 ± 10.212   | 76.869 ± 11.509   | 76.832 ± 11.417  | 0.964          |
| Laboratory findings                    |                                |                   |                   |                  |                |
| Serum K <sup>+</sup> (mEq/L)           | 4.478 ± 0.631                  | 4.591 ± 0.636     | 4.565 ± 0.655     | 4.591 ± 0.696    | 0.029          |
| 24-hour urine K <sup>+</sup> (mEq/day) | 54.269 ± 42.284                | 54.722 ± 24.712   | 51.545 ± 18.105   | 54.526 ± 21.649  | 0.613          |
| Hemoglobin (g/dL)                      | 13.242 ± 1.999                 | 13.070 ± 1.951    | 12.937 ± 1.950    | 12.661 ± 1.953   | < 0.001        |
| Albumin (g/dL)                         | 4.239 ± 0.400                  | 4.208 ± 0.345     | 4.187 ± 0.375     | 4.191 ± 0.410    | 0.149          |
| Total cholesterol (mg/dL)              | 170.359 ± 37.037               | 173.397 ± 38.337  | 175.562 ± 38.801  | 176.559 ± 37.049 | 0.063          |
| HDL-C (mg/dL)                          | 48.464 ± 15.924                | 49.059 ± 15.687   | 49.695 ± 14.816   | 51.206 ± 15.654  | 0.048          |
| LDL-C (mg/dL)                          | 94.889 ± 30.345                | 95.946 ± 30.971   | 96.319 ± 30.816   | 98.540 ± 30.240  | 0.324          |
| TG (mg/dL)                             | 156.218 ± 98.363               | 159.488 ± 102.875 | 158.821 ± 100.462 | 152.912 ± 93.190 | 0.742          |
| Fasting glucose (mg/dL)                | 110.076 ± 37.749               | 110.108 ± 42.353  | 109.392 ± 36.506  | 110.328 ± 36.391 | 0.984          |
| 25(OH) Vitamin D (ng/mL)               | 20.078 ± 10.870                | 18.520 ± 8.985    | 18.634 ± 8.876    | 17.113 ± 9.809   | 0.003          |

|                                    |                           |                            |                           |                            |         |
|------------------------------------|---------------------------|----------------------------|---------------------------|----------------------------|---------|
| hsCRP (mg/dL)                      | 0.640 [0.200, 1.800]      | 0.600 [0.210, 1.470]       | 0.500 [0.200, 1.700]      | 0.600 [0.300, 1.600]       | 0.256   |
| eGFR (mL/min./1.73m <sup>2</sup> ) | 55.510 ± 31.080           | 52.697 ± 28.262            | 54.024 ± 27.949           | 58.086 ± 32.035            | 0.040   |
| Spot urine ACR (mg/g Cr)           | 258.928 [67.606, 678.100] | 333.802 [72.875, 1037.514] | 285.232 [64.589, 923.782] | 400.713 [77.290, 1021.283] | < 0.001 |
| CKD stages                         |                           |                            |                           |                            | 0.097   |
| Stage 1                            | 84 (18.1)                 | 62 (13.3)                  | 66 (14.2)                 | 101 (21.7)                 |         |
| Stage 2                            | 92 (19.8)                 | 90 (19.4)                  | 98 (21.1)                 | 92 (19.8)                  |         |
| Stage 3a                           | 70 (15.1)                 | 93 (20.0)                  | 93 (20.0)                 | 66 (14.2)                  |         |
| Stage 3b                           | 106 (22.8)                | 109 (23.4)                 | 107 (23.0)                | 100 (21.5)                 |         |
| Stage 4                            | 97 (20.9)                 | 92 (19.8)                  | 87 (18.7)                 | 89 (19.1)                  |         |
| Stage 5                            | 16 (3.4)                  | 19 (4.1)                   | 14 (3.0)                  | 17 (3.7)                   |         |

Note: Values for categorical variables are given as number (percentage); values for continuous variables, as mean ± standard deviation or median [interquartile range]. Abbreviations: ACEi, angiotensin converting enzyme inhibitor; ACR, albumin-to-creatinine ratio; ARB, angiotensin receptor blocker; BMI, body mass index; CKD, chronic kidney disease; CKD-EPI, Chronic Kidney Disease Epidemiology Collaboration; Cr, creatinine; DBP, diastolic blood pressure; DM, diabetes mellitus; eGFR, estimated glomerular filtration rate; hsCRP, high-sensitivity C-reactive protein; HTN, hypertension; K<sup>+</sup>/Cr, potassium/creatinine ratio; SBP, blood pressure, WC, waist circumference; WHR, waist-to-hip ratio.

**Table S2. Baseline characteristics of study participants in the quartiles by spot urine Na<sup>+</sup>/K<sup>+</sup>**

|                                        | Spot urine Na <sup>+</sup> /K <sup>+</sup> |                  |                  |                 | <i>P</i> value |
|----------------------------------------|--------------------------------------------|------------------|------------------|-----------------|----------------|
|                                        | Q1                                         | Q 2              | Q 3              | Q 4             |                |
| Urine Na <sup>+</sup> /K <sup>+</sup>  | 0.814 ±0.273                               | 1.542 ±0.185     | 2.288 ±0.249     | 3.943 ±1.230    | < 0.001        |
| Age (year)                             | 53.196 ±12.404                             | 54.185 ±11.459   | 53.918 ±11.332   | 53.135 ±12.878  | 0.451          |
| Male                                   | 274 (58.9)                                 | 275 (59.1)       | 275 (59.3)       | 296 (63.5)      | 0.416          |
| Charlson comorbidity index             |                                            |                  |                  |                 | 0.114          |
| 0 – 3                                  | 358 (77.0)                                 | 351 (75.5)       | 339 (73.1)       | 323 (69.3)      |                |
| 4 – 5                                  | 104 (22.4)                                 | 105 (22.6)       | 115 (24.8)       | 136 (29.2)      |                |
| ≥ 6                                    | 3 (0.6)                                    | 9 (1.9)          | 10 (2.1)         | 7 (1.5)         |                |
| History of DM                          | 138 (29.7)                                 | 136 (29.2)       | 145 (31.3)       | 171 (36.7)      | 0.193          |
| Medication                             |                                            |                  |                  |                 |                |
| ACEi/ARBs                              | 382 (88.4)                                 | 410 (93.8)       | 411 (92.4)       | 398 (89.2)      |                |
| Use of diuretics                       | 134 (31.0)                                 | 126 (28.8)       | 142 (31.9)       | 159 (35.7)      | 0.177          |
| Number of antihypertensive drugs ≥ 3   | 140 (30.1)                                 | 122 (26.2)       | 132 (28.4)       | 171 (36.7)      | 0.004          |
| BMI (kg/m <sup>2</sup> )               | 24.388 ±3.291                              | 24.364 ±3.329    | 24.833 ±3.387    | 24.676 ±3.472   | 0.097          |
| WC (cm)                                |                                            |                  |                  |                 |                |
| SBP (mmHg)                             | 125.555 ±14.343                            | 125.432 ±14.709  | 127.573 ±15.296  | 129.524 ±16.804 | < 0.001        |
| DBP (mmHg)                             | 76.529 ±10.285                             | 76.839 ±10.306   | 76.700 ±10.740   | 77.120 ±12.252  | 0.866          |
| Laboratory findings                    |                                            |                  |                  |                 |                |
| Serum K <sup>+</sup> (mEq/L)           | 4.455 ±0.594                               | 4.555 ±0.647     | 4.588 ±0.668     | 4.626 ±0.700    | 0.001          |
| 24-hour urine K <sup>+</sup> (mEq/day) | 60.995 ±42.766                             | 54.003 ±21.368   | 51.857 ±19.177   | 46.306 ±18.768  | < 0.000        |
| Hemoglobin (g/dL)                      | 13.253 ±1.901                              | 13.063 ±1.921    | 12.997 ±1.997    | 12.598 ±2.018   | < 0.001        |
| Albumin (g/dL)                         | 4.253 ±0.365                               | 4.204 ±0.388     | 4.204 ±0.366     | 4.164 ±0.409    | 0.006          |
| Total cholesterol (mg/dL)              | 173.877 ±37.006                            | 175.173 ±38.262  | 174.335 ±37.096  | 172.502 ±39.099 | 0.751          |
| HDL-C (mg/dL)                          | 50.121 ±16.006                             | 50.761 ±16.201   | 48.941 ±14.065   | 48.597 ±15.776  | 0.122          |
| LDL-C (mg/dL)                          | 97.054 ±29.836                             | 97.176 ±31.488   | 95.920 ±30.723   | 95.534 ±30.391  | 0.805          |
| TG (mg/dL)                             | 153.941 ±93.076                            | 153.991 ±103.415 | 164.493 ±103.564 | 155.043 ±94.442 | 0.301          |
| Fasting glucose (mg/dL)                | 110.451 ±40.739                            | 108.857 ±31.859  | 109.029 ±39.263  | 111.530 ±40.670 | 0.684          |
| 25(OH) Vitamin D (ng/mL)               | 20.197 ±10.127                             | 18.808 ±9.640    | 19.199 ±9.588    | 16.239 ±9.078   | < 0.001        |

|                                    |                           |                           |                            |                             |         |
|------------------------------------|---------------------------|---------------------------|----------------------------|-----------------------------|---------|
| hsCRP (mg/dL)                      | 0.600 [0.200, 1.600]      | 0.600 [0.200, 1.400]      | 0.650 [0.300, 1.900]       | 0.600 [0.300, 1.800]        | 0.604   |
| eGFR (mL/min./1.73m <sup>2</sup> ) | 60.697 ± 31.465           | 57.133 ± 29.586           | 51.950 ± 28.000            | 50.540 ± 29.534             | < 0.001 |
| Spot urine ACR (mg/g Cr)           | 240.228 [44.706, 711.697] | 295.643 [64.456, 865.901] | 359.382 [104.279, 966.592] | 383.586 [104.246, 1165.183] | < 0.001 |
| CKD stages                         |                           |                           |                            |                             | 0.001   |
| Stage 1                            | 106 (22.8)                | 83 (17.8)                 | 62 (13.4)                  | 62 (13.3)                   |         |
| Stage 2                            | 99 (21.3)                 | 102 (21.9)                | 90 (19.4)                  | 81 (17.4)                   |         |
| Stage 3a                           | 80 (17.2)                 | 84 (18.1)                 | 82 (17.7)                  | 76 (16.3)                   |         |
| Stage 3b                           | 96 (20.6)                 | 102 (21.9)                | 111 (23.9)                 | 113 (24.2)                  |         |
| Stage 4                            | 69 (14.8)                 | 78 (16.8)                 | 105 (22.6)                 | 113 (24.2)                  |         |
| Stage 5                            | 15 (3.2)                  | 16 (3.4)                  | 14 (3.0)                   | 21 (4.5)                    |         |

Note: Values for categorical variables are given as number (percentage); values for continuous variables, as mean ± standard deviation or median [interquartile range]. Abbreviations: ACEi, angiotensin converting enzyme inhibitor; ACR, albumin-to-creatinine ratio; ARB, angiotensin receptor blocker; BMI, body mass index; CKD, chronic kidney disease; CKD-EPI, Chronic Kidney Disease Epidemiology Collaboration; Cr, creatinine; DBP, diastolic blood pressure; DM, diabetes mellitus; eGFR, estimated glomerular filtration rate; hsCRP, high-sensitivity C-reactive protein; HTN, hypertension; K<sup>+</sup>/Cr, potassium/creatinine ratio; SBP, blood pressure, WC, waist circumference; WHR, waist-to-hip ratio.

**Table S3. Cox regression analysis of urine sodium excretion for clinical outcomes**

|                     | Spot urine Na <sup>+</sup> /Cr | Cases, n (%) | Unadjusted           |                | Adjusted             |                |
|---------------------|--------------------------------|--------------|----------------------|----------------|----------------------|----------------|
|                     |                                |              | HR (95% CIs)         | <i>P</i> value | HR (95% CIs)         | <i>P</i> value |
| eMACE               | Q1                             | 29 (6.2)     | Reference            |                | Reference            |                |
|                     | Q2                             | 28 (6.0)     | 1.109 (0.621, 1.982) | 0.726          | 1.018 (0.560, 1.850) | 0.955          |
|                     | Q3                             | 32 (6.9)     | 1.239 (0.697, 2.203) | 0.465          | 1.245 (0.690, 2.245) | 0.467          |
|                     | Q4                             | 43 (9.2)     | 1.555 (0.902, 2.680) | 0.112          | 1.340 (0.752, 2.388) | 0.320          |
| All-cause mortality | Q1                             | 20 (4.3)     | Reference            |                | Reference            |                |
|                     | Q2                             | 17 (3.7)     | 0.843 (0.407, 1.747) | 0.646          | 0.925 (0.419, 2.042) | 0.847          |
|                     | Q3                             | 19 (4.1)     | 1.063 (0.526, 2.151) | 0.865          | 1.119 (0.523, 2.396) | 0.772          |
|                     | Q4                             | 15 (3.2)     | 0.671 (0.308, 1.460) | 0.314          | 0.562 (0.244, 1.296) | 0.177          |

Note: Models were adjusted for age, sex, Charlson comorbidity index, history of DM, medication (ACEi/ARBs, diuretics, number of antihypertensive drugs), BMI, WC, SBP, DBP, hemoglobin, albumin, fasting serum glucose, HDL-C, TG, 25(OH) vitamin D, hs-CRP levels, eGFR, spot urine ACR, and ARV. Abbreviations: CI, confidence interval; CI, confidence interval; eGFR, estimated glomerular filtration rate; HR, hazard ratio; Na<sup>+</sup>/Cr, sodium-to-creatinine ratio; Q1, 1<sup>st</sup> quartile; Q2, 2<sup>nd</sup> quartile; Q3, 3<sup>rd</sup> quartile; Q4, 4<sup>th</sup> quartile.

**Table S4. Cox regression analysis of urine Na<sup>+</sup>/K<sup>+</sup> for clinical outcomes**

|                     | Spot urine Na <sup>+</sup> /K <sup>+</sup> | Cases, n (%) | Unadjusted           |                | Adjusted             |                |
|---------------------|--------------------------------------------|--------------|----------------------|----------------|----------------------|----------------|
|                     |                                            |              | HR (95% CIs)         | <i>P</i> value | HR (95% CIs)         | <i>P</i> value |
| eMACE               | Q1                                         | 26 (5.6)     | Reference            |                | Reference            |                |
|                     | Q2                                         | 37 (8.0)     | 1.217 (0.693, 2.138) | 0.494          | 1.244 (0.700, 2.211) | 0.456          |
|                     | Q3                                         | 30 (6.5)     | 1.128 (0.639, 1.992) | 0.677          | 1.102 (0.619, 1.963) | 0.742          |
|                     | Q4                                         | 39 (8.4)     | 1.358 (0.786, 2.346) | 0.273          | 1.197 (0.680, 2.109) | 0.534          |
| All-cause mortality | Q1                                         | 20 (4.3)     | Reference            |                | Reference            |                |
|                     | Q2                                         | 18 (3.9)     | 0.830 (0.405, 1.702) | 0.612          | 0.790 (0.365, 1.710) | 0.550          |
|                     | Q3                                         | 16 (3.4)     | 0.694 (0.328, 1.468) | 0.340          | 0.657 (0.301, 1.435) | 0.292          |
|                     | Q4                                         | 17 (3.6)     | 0.806 (0.393, 1.653) | 0.556          | 0.617 (0.285, 1.335) | 0.220          |

Note: Models were adjusted for age, sex, Charlson comorbidity index, history of DM, medication (ACEi/ARBs, diuretics, number of antihypertensive drugs), BMI, WC, SBP, DBP, hemoglobin, albumin, fasting serum glucose, HDL-C, TG, 25(OH) vitamin D, hs-CRP levels, eGFR, spot urine ACR, and ARV. Abbreviations: CI, confidence interval; eGFR, estimated glomerular filtration rate; HR, hazard ratio; Q1, 1<sup>st</sup> quartile; Q2, 2<sup>nd</sup> quartile; Q3, 3<sup>rd</sup> quartile; Q4, 4<sup>th</sup> quartile.

**Table S5. Multivariate linear regression analysis for BPV with low urine potassium excretion excluding the subjects with CKD stage 5**

|     | Unadjusted             |                | Adjusted               |                |
|-----|------------------------|----------------|------------------------|----------------|
|     | Coefficients (95% CIs) | <i>P</i> value | Coefficients (95% CIs) | <i>P</i> value |
| ARV | 1.265 (0.547, 1.983)   | 0.001          | 1.092 (0.353, 1.832)   | 0.004          |
| SD  | 0.558 (-0.032, 1.148)  | 0.064          | 0.418 (-0.194, 1.031)  | 0.180          |
| CoV | 0.005 (0.000, 0.009)   | 0.047          | 0.004 (-0.001, 0.009)  | 0.157          |

Note: Models were adjusted for age, sex, Charlson comorbidity index, history of DM, medication (ACEi/ARBs, diuretics, number of antihypertensive drugs), BMI, WC, SBP, DBP, hemoglobin, albumin, fasting serum glucose, HDL-C, TG, 25(OH) vitamin D, hs-CRP levels, eGFR and spot urine ACR.

Abbreviations: ARV, average real variability; CI, confidence interval; CoV, coefficient of variation; SD, standard deviation.

**Table S6. Cox regression analysis of urine potassium excretion for clinical outcomes excluding the subjects with CKD stage 5**

|                            | Spot urine K <sup>+</sup> /Cr | Cases, n (%) | Unadjusted           |         | Adjusted             |         |
|----------------------------|-------------------------------|--------------|----------------------|---------|----------------------|---------|
|                            |                               |              | HR (95% CIs)         | P value | HR (95% CIs)         | P value |
| <b>eMACE</b>               | Q1                            | 35 (7.9)     | 1.907 (1.113, 3.267) | 0.019   | 2.475 (1.128, 5.428) | 0.024   |
|                            | Q2                            | 26 (5.3)     | 1.671 (0.954, 2.929) | 0.073   | 1.147 (0.508, 2.591) | 0.741   |
|                            | Q3                            | 29 (6.4)     | 1.390 (0.810, 2.383) | 0.232   | 1.586 (0.775, 3.249) | 0.207   |
|                            | Q4                            | 39 (3.6)     | Reference            |         | Reference            |         |
| <b>All-cause mortality</b> | Q1                            | 16 (3.6)     | 0.678 (0.290, 1.586) | 0.370   | 0.578 (0.224, 1.491) | 0.257   |
|                            | Q2                            | 20 (4.5)     | 1.432 (0.707, 2.899) | 0.319   | 1.200 (0.545, 2.641) | 0.650   |
|                            | Q3                            | 15 (3.3)     | 0.908 (0.414, 1.991) | 0.811   | 0.852 (0.375, 1.932) | 0.701   |
|                            | Q4                            | 17 (3.8)     | Reference            |         | Reference            |         |

Note: Models were adjusted for age, sex, Charlson comorbidity index, history of DM, medication (ACEi/ARBs, diuretics, number of antihypertensive drugs), BMI, WC, SBP, DBP, hemoglobin, albumin, fasting serum glucose, HDL-C, TG, 25(OH) vitamin D, hs-CRP levels, eGFR, spot urine ACR, and ARV. Abbreviations: CI, confidence interval; K<sup>+</sup>/Cr, potassium-to-creatinine ratio; CI, confidence interval; eGFR, estimated glomerular filtration rate; HR, hazard ratio; Q1, 1<sup>st</sup> quartile; Q2, 2<sup>nd</sup> quartile; Q3, 3<sup>rd</sup> quartile; Q4, 4<sup>th</sup> quartile.

**Table S7. Multivariate linear regression analysis for BPV with low urine potassium excretion excluding the subjects with CKD stage 1**

|            | Unadjusted             |                | Adjusted               |                |
|------------|------------------------|----------------|------------------------|----------------|
|            | Coefficients (95% CIs) | <i>P</i> value | Coefficients (95% CIs) | <i>P</i> value |
| <b>ARV</b> | 1.334 (0.575, 2.113)   | 0.001          | 1.225 (0.433, 2.018)   | 0.002          |
| <b>SD</b>  | 0.525 (-0.096, 1.146)  | 0.098          | 0.494 (-0.150, 1.139)  | 0.133          |
| <b>CoV</b> | 0.005 (0.000, 0.010)   | 0.062          | 0.004 (-0.001, 0.009)  | 0.107          |

Note: Models were adjusted for age, sex, Charlson comorbidity index, history of DM, medication (ACEi/ARBs, diuretics, number of antihypertensive drugs), BMI, WC, SBP, DBP, hemoglobin, albumin, fasting serum glucose, HDL-C, TG, 25(OH) vitamin D, hs-CRP levels, eGFR and spot urine ACR. Abbreviations: ARV, average real variability; CI, confidence interval.

**Table S8. Cox regression analysis of urine potassium excretion for clinical outcomes excluding the subjects with CKD stage 1**

|                            | Spot urine K <sup>+</sup> /Cr | Cases, n (%) | Unadjusted           |         | Adjusted             |         |
|----------------------------|-------------------------------|--------------|----------------------|---------|----------------------|---------|
|                            |                               |              | HR (95% CIs)         | P value | HR (95% CIs)         | P value |
| <b>eMACE</b>               | Q1                            | 34 (8.2)     | 1.802 (1.029, 3.158) | 0.039   | 2.857 (1.247, 6.546) | 0.013   |
|                            | Q2                            | 26 (6.5)     | 1.534 (0.860, 2.736) | 0.147   | 1.293 (0.561, 2.980) | 0.546   |
|                            | Q3                            | 27 (6.9)     | 1.150 (0.645, 2.051) | 0.635   | 1.404 (0.619, 3.186) | 0.417   |
|                            | Q4                            | 35 (10.4)    | Reference            |         | Reference            |         |
| <b>All-cause mortality</b> | Q1                            | 17 (4.1)     | 0.595 (0.261, 1.358) | 0.217   | 0.623 (0.247, 1.571) | 0.316   |
|                            | Q2                            | 19 (4.7)     | 1.099 (0.539, 2.244) | 0.795   | 1.171 (0.529, 2.590) | 0.697   |
|                            | Q3                            | 17 (4.3)     | 0.879 (0.413, 1.870) | 0.737   | 0.992 (0.448, 2.193) | 0.984   |
|                            | Q4                            | 17 (5.1)     | Reference            |         | Reference            |         |

Note: Models were adjusted for age, sex, Charlson comorbidity index, history of DM, medication (ACEi/ARBs, diuretics, number of antihypertensive drugs), BMI, WC, SBP, DBP, hemoglobin, albumin, fasting serum glucose, HDL-C, TG, 25(OH) vitamin D, hs-CRP levels, eGFR, spot urine ACR, and ARV. Abbreviations: CI, confidence interval; K<sup>+</sup>/Cr, potassium-to-creatinine ratio; CI, confidence interval; eGFR, estimated glomerular filtration rate; HR, hazard ratio; Q1, 1<sup>st</sup> quartile; Q2, 2<sup>nd</sup> quartile; Q3, 3<sup>rd</sup> quartile; Q4, 4<sup>th</sup> quartile.

**Table S9. Multivariate linear regression analysis for ARV with low urine potassium excretion in various subgroups**

|                                     | Unadjusted             |                          | Adjusted               |                          |
|-------------------------------------|------------------------|--------------------------|------------------------|--------------------------|
|                                     | Coefficients (95% CIs) | <i>P</i> for interaction | Coefficients (95% CIs) | <i>P</i> for interaction |
| Age < 60 years                      | 0.405 (-1.138, 1.948)  | 0.087                    | -0.569 (-2.159, 1.021) | 0.247                    |
| Age ≥ 60 years                      | 1.568 (0.566, 2.569)   |                          | 1.067 (0.023, 2.112)   |                          |
| Diuretics (-)                       | 1.122 (0.273, 1.970)   | 0.671                    | 0.995 (0.126, 1.864)   | 0.587                    |
| Diuretics (+)                       | 1.275 (-0.054, 2.603)  |                          | 1.529 (0.135, 2.923)   |                          |
| eGFR ≥ 45 mL/min/1.73m <sup>2</sup> | 0.098 (-0.843, 1.039)  | 0.014                    | 0.014 (-0.957, 0.985)  | 0.026                    |
| eGFR < 45 mL/min/1.73m <sup>2</sup> | 1.884 (0.790, 2.978)   |                          | 2.116 (0.970, 3.262)   |                          |
| Spot urine ACR < 300 mg/gCr         | 0.592 (-0.331, 1.516)  | 0.409                    | 0.684 (-0.282, 1.649)  | 0.217                    |
| Spot urine ACR ≥ 300 mg/gCr         | 1.727 (0.666, 2.787)   |                          | 1.695 (0.583, 2.806)   |                          |

Note: Models were adjusted for age, sex, Charlson comorbidity index, history of DM, medication (ACEi/ARBs, diuretics, number of antihypertensive drugs), BMI, WC, SBP, DBP, hemoglobin, albumin, fasting serum glucose, HDL-C, TG, 25(OH) vitamin D, hs-CRP levels, eGFR and spot urine ACR. Abbreviations: ACR, albumin-to-creatinine ratio; CI, confidence interval; eGFR, estimated glomerular filtration rate.

**Table S10. Cox regression analysis of urine potassium excretion for all-cause mortality in various subgroups**

|                                     | Spot urine K <sup>+</sup> /Cr | Cases, n (%) | Unadjusted           |                   | Adjusted              |                   |
|-------------------------------------|-------------------------------|--------------|----------------------|-------------------|-----------------------|-------------------|
|                                     |                               |              | HR (95% CIs)         | P for interaction | HR (95% CIs)          | P for interaction |
| Age < 60 years                      | Q1                            | 6 (1.9)      | 1.183 (0.265, 5.286) | 0.373             | 1.360 (0.192, 9.625)  | 0.708             |
|                                     | Q2                            | 7 (102)      | 1.800 (0.450, 7.197) |                   | 5.642 (0.859, 37.064) |                   |
|                                     | Q3                            | 4 (1.3)      | 1.269 (0.284, 5.672) |                   | 2.373 (0.354, 15.928) |                   |
|                                     | Q4                            | 3 (1.1)      | Reference            |                   | Reference             |                   |
| Age ≥ 60 years                      | Q1                            | 11 (7.7)     | 0.659 (0.239, 1.815) | 0.814             | 0.417 (0.129, 1.351)  | 0.851             |
|                                     | Q2                            | 13 (8.4)     | 1.400 (0.613, 3.196) |                   | 1.057 (0.390, 2.867)  |                   |
|                                     | Q3                            | 13 (7.9)     | 0.970 (0.403, 2.332) |                   | 0.820 (0.318, 2.114)  |                   |
|                                     | Q4                            | 14 (7.7)     | Reference            |                   | Reference             |                   |
| Diuretics (-)                       | Q1                            | 5 (1.8)      | 0.882 (0.237, 3.283) | 0.528             | 0.619 (0.130, 2.954)  | 0.989             |
|                                     | Q2                            | 11 (3.5)     | 2.139 (0.743, 6.155) |                   | 1.604 (0.470, 5.467)  |                   |
|                                     | Q3                            | 5 (1.7)      | 1.008 (0.292, 3.485) |                   | 0.810 (0.214, 3.064)  |                   |
|                                     | Q4                            | 8 (2.6)      | Reference            |                   | Reference             |                   |
| Diuretics (+)                       | Q1                            | 10 (5.9)     | 2.873 (1.264, 6.531) | 0.665             | 2.936 (0.465, 18.526) | 0.703             |
|                                     | Q2                            | 9 (7.4)      | 1.933 (0.666, 5.604) |                   | 0.521 (0.066, 4.077)  |                   |
|                                     | Q3                            | 11 (7.9)     | 0.939 (0.409, 2.158) |                   | 1.445 (0.132, 15.812) |                   |
|                                     | Q4                            | 9 (6.9)      | Reference            |                   | Reference             |                   |
| eGFR ≥ 45 mL/min/1.73m <sup>2</sup> | Q1                            | 3 (1.5)      | 0.477 (0.096, 2.366) | 0.528             | 0.683 (0.088, 5.325)  | 0.989             |
|                                     | Q2                            | 5 (2.1)      | 1.029 (0.314, 3.372) |                   | 1.964 (0.381, 10.130) |                   |
|                                     | Q3                            | 5 (1.9)      | 0.955 (0.291, 3.133) |                   | 1.613 (0.354, 7.351)  |                   |
|                                     | Q4                            | 8 (2.6)      | Reference            |                   | Reference             |                   |
| eGFR < 45 mL/min/1.73m <sup>2</sup> | Q1                            | 14 (5.3)     | 0.635 (0.230, 1.750) | 0.528             | 0.688 (0.208, 2.277)  | 0.989             |
|                                     | Q2                            | 15 (6.5)     | 1.343 (0.542, 3.327) |                   | 1.442 (0.497, 4.180)  |                   |
|                                     | Q3                            | 12 (6.0)     | 0.947 (0.353, 2.543) |                   | 0.919 (0.315, 2.680)  |                   |
|                                     | Q4                            | 9 (5.8)      | Reference            |                   | Reference             |                   |
| Spot urine ACR < 300 mg/gCr         | Q1                            | 8 (3.7)      | 0.867 (0.264, 2.842) | 0.665             | 0.971 (0.237, 3.982)  | 0.703             |
|                                     | Q2                            | 8 (3.3)      | 1.203 (0.417, 3.467) |                   | 1.093 (0.338, 3.532)  |                   |

|                             |    |          |                      |                      |
|-----------------------------|----|----------|----------------------|----------------------|
|                             | Q3 | 9 (4.0)  | 1.273 (0.441, 3.674) | 1.053 (0.333, 3.352) |
|                             | Q4 | 9 (4.0)  | Reference            | Reference            |
| Spot urine ACR ≥ 300 mg/gCr | Q1 | 9 (3.6)  | 0.638 (0.202, 2.011) | 0.392 (0.062, 2.499) |
|                             | Q2 | 12 (5.3) | 1.637 (0.634, 4.224) | 1.32 (0.298, 5.959)  |
|                             | Q3 | 8 (3.3)  | 0.840 (0.282, 2.499) | 0.536 (0.116, 2.468) |
|                             | Q4 | 8 (3.4)  | Reference            | Reference            |

Note: Models were adjusted for age, sex, Charlson comorbidity index, history of DM, medication (ACEi/ARBs, diuretics, number of antihypertensive drugs), BMI, WC, SBP, DBP, hemoglobin, albumin, fasting serum glucose, HDL-C, TG, 25(OH) vitamin D, hs-CRP levels, eGFR, spot urine ACR, and ARV.

Abbreviations: CI, confidence interval; DM, diabetes mellitus; K<sup>+</sup>/Cr, potassium-to-creatinine ratio; CI, confidence interval; eGFR, estimated glomerular filtration rate; HR, hazard ratio; Q1, 1<sup>st</sup> quartile; Q2, 2<sup>nd</sup> quartile; Q3, 3<sup>rd</sup> quartile; Q4, 4<sup>th</sup> quartile.
